# Supplementary material for: Microwave-induced electric discharges on metal particles for the synthesis of inorganic nanomaterials under solvent-free conditions
Source: publisher site journal article supplement (doi:10.3762/bjnano.11.86), 2020-07-13
Supplement: Additional file 1 [file 2190-4286-11-86-S1.pdf]

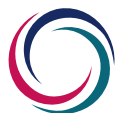

## Supporting Information

for

### **Microwave-induced electric discharges on metal particles for the synthesis of inorganic nanomaterials under solvent-free conditions**

Vijay Tripathi, Harit Kumar, Anubhav Agarwal and Leela S. Panchakarla

*Beilstein J. Nanotechnol.* **2020**, *11*, 1019–1025. [doi:10.3762/bjnano.11.86](https://doi.org/10.3762/bjnano.11.86)

### **Characterization details of g-C<sub>3</sub>N<sub>4</sub> by XRD and XPS. Electron microscope analysis of Ni, Cu, ZnF<sub>2</sub>, NiF<sub>2</sub>, and ZnO nanostructures**

Thermal decomposition of physically mixed melamine with urea in a tube furnace at 600 °C for 4 h in argon atmosphere yielded orange precipitates of graphitic carbon nitride ( $g\text{-C}_3\text{N}_4$ ). The XRD pattern (Figure S1a) and the XPS spectrum (Figure S2b) match with reported literature [1], which confirms the formation of  $g\text{-C}_3\text{N}_4$ .

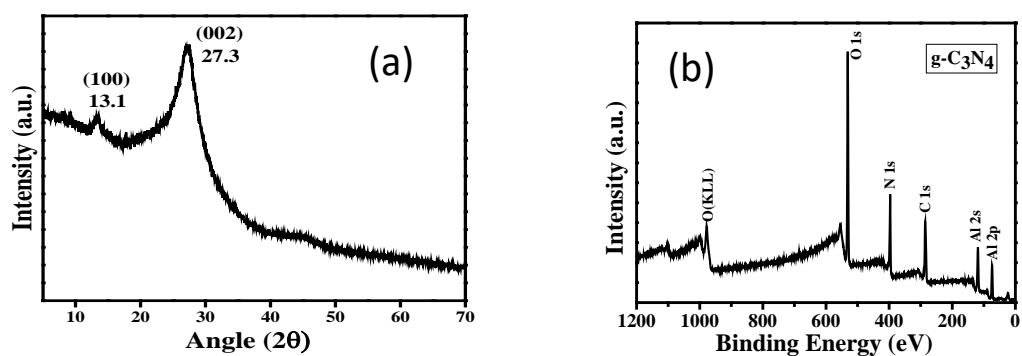

**Figure S1:** (a) XRD patterns and (b) XPS of as prepared  $g\text{-C}_3\text{N}_4$ .

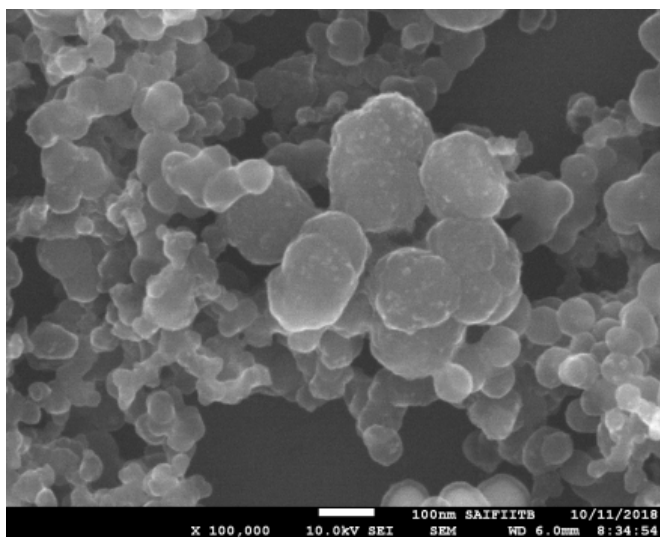

**Figure S2:** SEM image of Ni nanoparticles covered with amorphous carbon prepared by irradiating Ni metal with microwaves in the presence of  $g\text{-C}_3\text{N}_4$  in a Teflon beaker for 1 min.

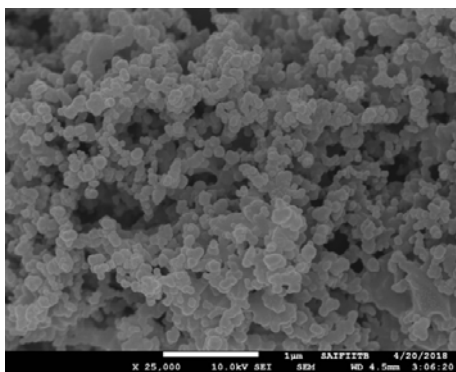

**Figure S3:** SEM image of Cu nanoparticles prepared by irradiation of Cu metal with microwaves in the presence of graphite in a Teflon beaker for 1 min.

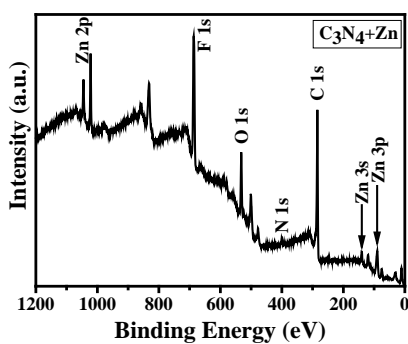

**Figure S4:** XPS patterns of ZnF<sub>2</sub> nanorods prepared by irradiating zinc metal with microwaves in the presence of g-C<sub>3</sub>N<sub>4</sub> in a Teflon beaker for 1 min.

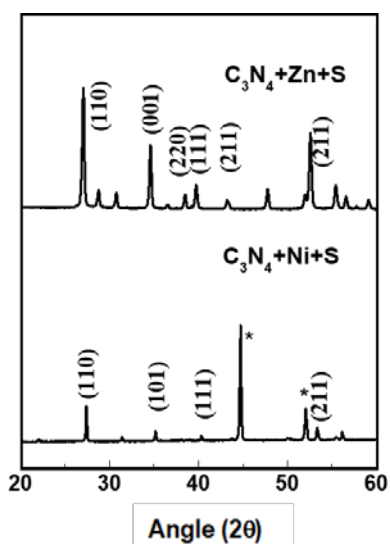

**Figure S5:** XRD patterns of nanorods of ZnF<sub>2</sub> and NiF<sub>2</sub> synthesized in the presence of sulfur by microwave irradiation in the presence of g-C<sub>3</sub>N<sub>4</sub> in a Teflon beaker for 2 min.

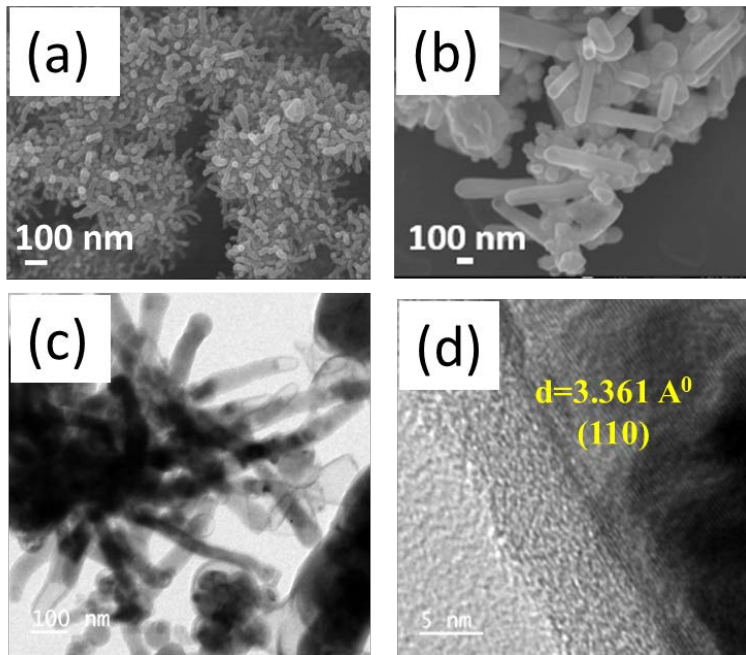

**Figure S6:** (a, b) SEM, (c) TEM, and (d) HRTEM images of ZnF<sub>2</sub> nanorods synthesized by microwave irradiation of Zn with sulfur and g-C<sub>3</sub>N<sub>4</sub> in a Teflon beaker for 2 min.

Microwave irradiation of Ni with sulfur and g-C<sub>3</sub>N<sub>4</sub> in a Teflon beaker yielded NiF<sub>2</sub> nanorods. The formation of NiF<sub>2</sub> nanorods along with Ni nanoparticles covered with fluorinated amorphous carbon can be seen in SEM images (Figure S7a,b). The SEM image and the EDS mapping of Ni, F and C on top of one of the NiF<sub>2</sub> nanorods (Figure S7c) confirms the presence of Ni, F and C. The TEM image in Figure S7d and the inset within confirm the amorphous coating on the NiF<sub>2</sub> nanorod. The HRTEM image in Figure S7e confirms the single-crystalline nature of the nanorods with <111> growth direction.

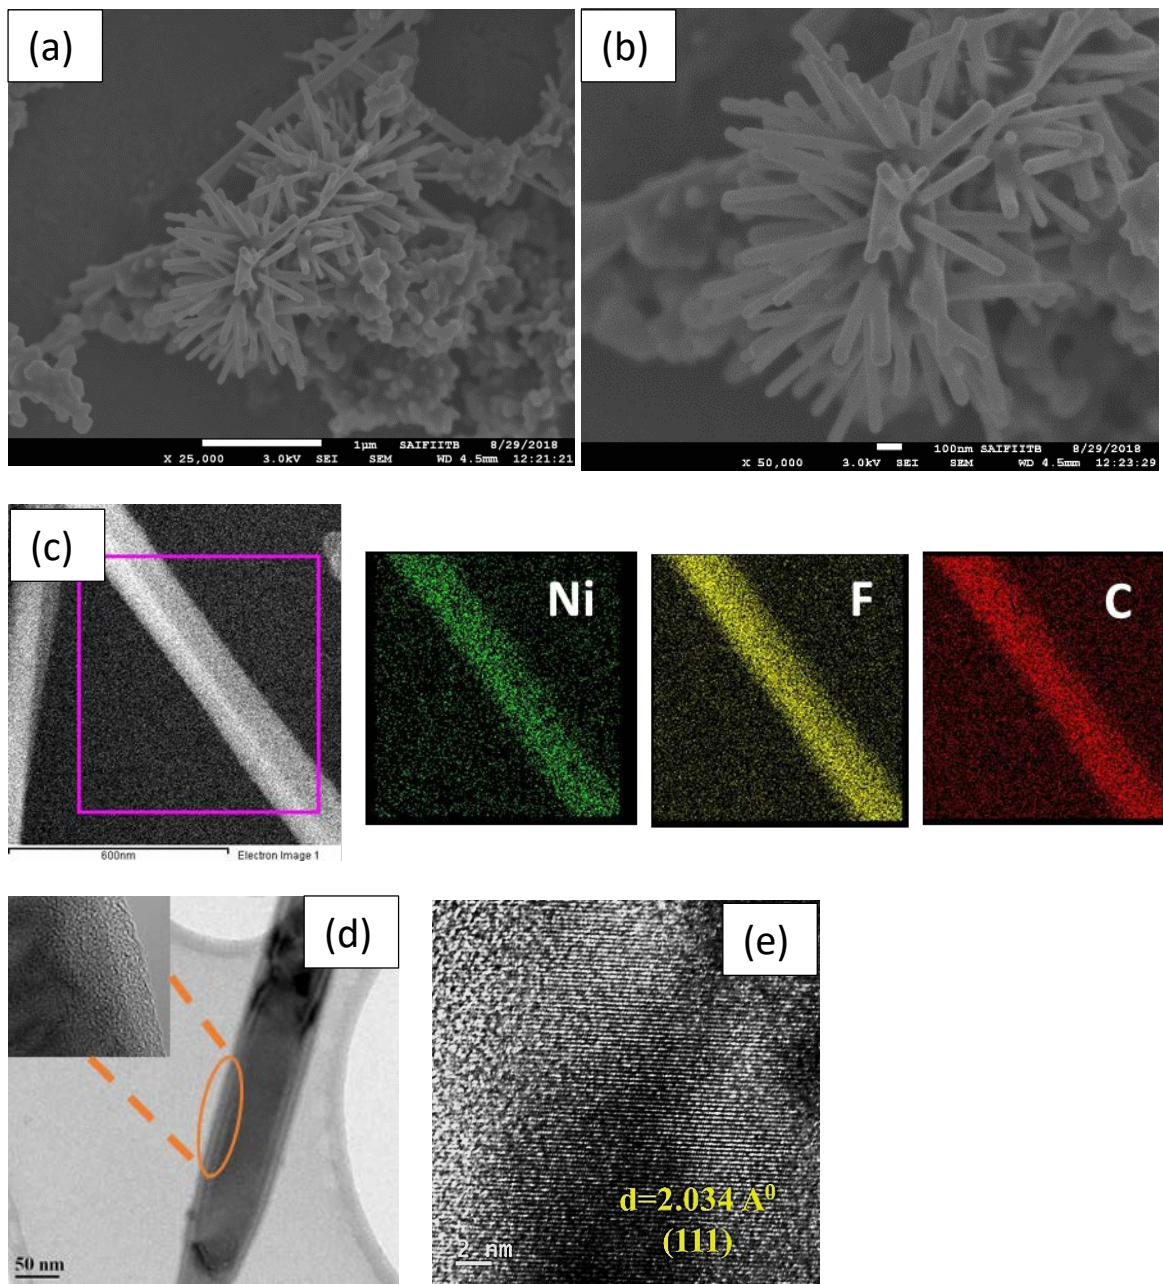

**Figure S7:** (a, b) SEM images and (c) EDS elemental mapping of Ni, F, C on one of the NiF<sub>2</sub> nanorods synthesized by microwave irradiation of Ni with sulfur and g-C<sub>3</sub>N<sub>4</sub> in a Teflon beaker for 2 min. (d) TEM and (e) HRTEM image of the NiF<sub>2</sub> nanorod. The inset in (d) shows the magnified image at the edge of the nanorod.

Exfoliation of graphite in the presence of Zn metal under microwave irradiation produced few-layered graphene along with nanoparticles of ZnO. A HRTEM image of ZnO nanoparticle is shown in Figure S8. The interlayer lattice spacing of 0.282 nm is attributed to the (100) planes of ZnO.

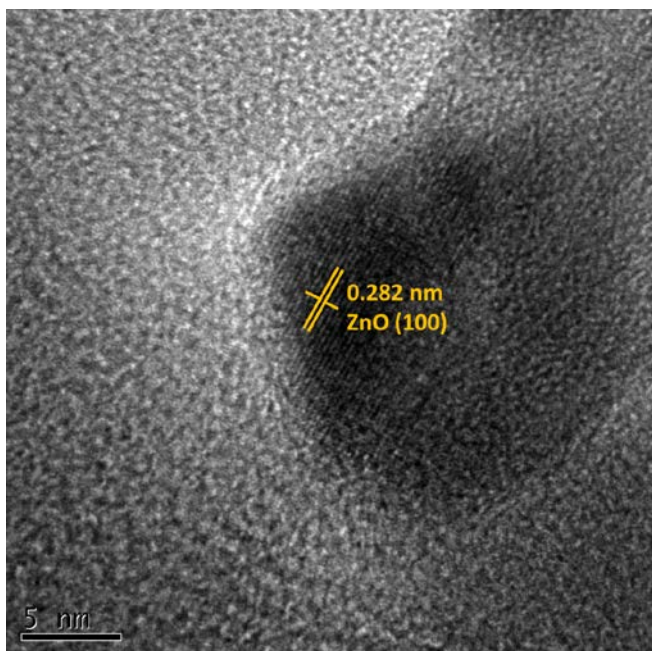

**Figure S8:** HRTEM image of ZnO nanoparticle

#### References

1. Dante, R. C.; Martín-Ramos, P.; Correa-Guimaraes, A.; Martín-Gil, J. *Mater. Chem. Phys.* **2011**, *130*, 1094–1102. doi:10.1016/j.matchemphys.2011.08.041
